# Supplementary material for: Lipo-polymeric nano-complexes for dermal delivery of a model protein
Source: Royal Society of Chemistry journal article supplement (doi:10.1039/d4ra02337d), 2024-01-01
Supplement: d4ra02337d1.pdf [file d4ra02337d1.pdf]

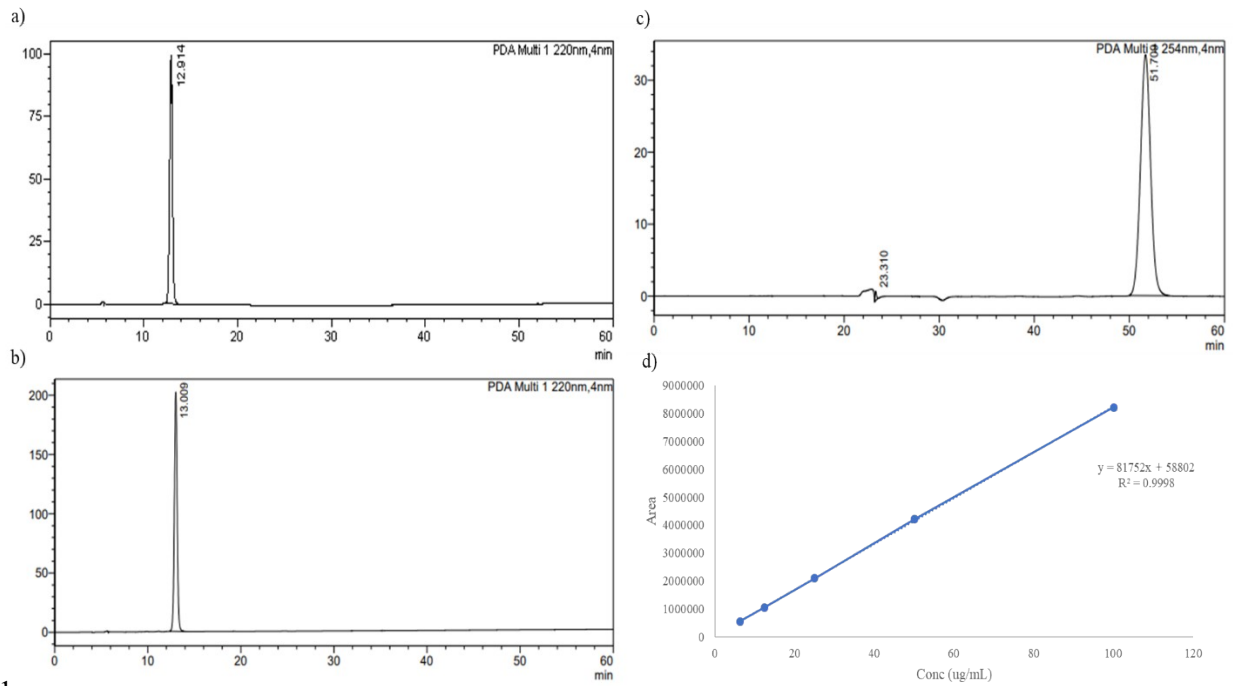

1

2 Figure S1: Illustrates the HPLC chromatogram of a) FITC-BSA, b) Pure BSA, and c) FITC,  
 3 and d) Illustrates the Calibration curve of FITC-BSA from 6.25 -100  $\mu\text{g/mL}$ . Each value is  
 4 represented as mean  $\pm$  SD. #,  $p < 0.001$ .

5

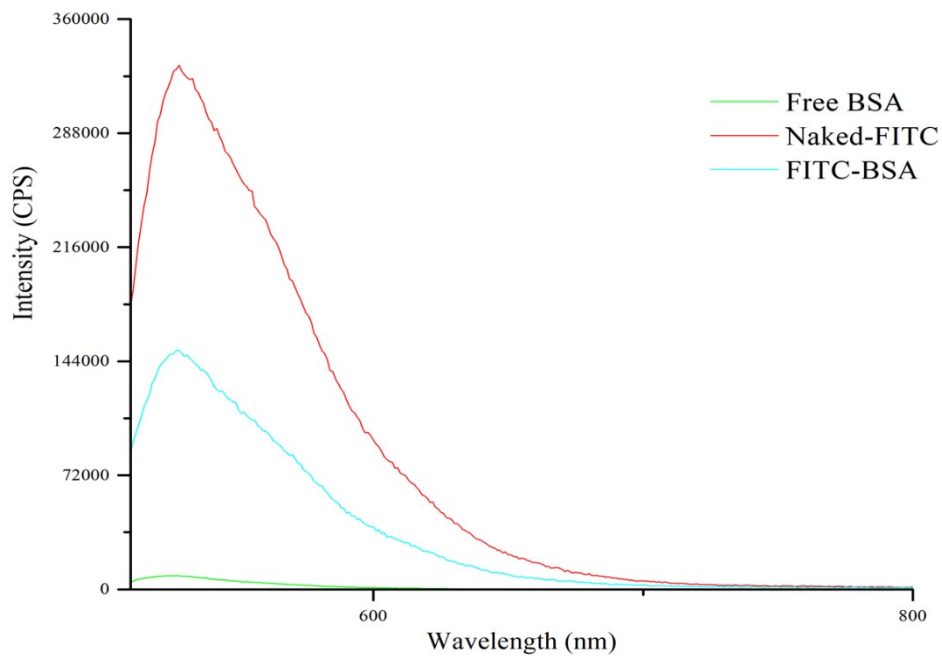

6

7 Figure S2. Fluorescence chromatogram of FITC-BSA, Free BSA, and Naked- FITC

8

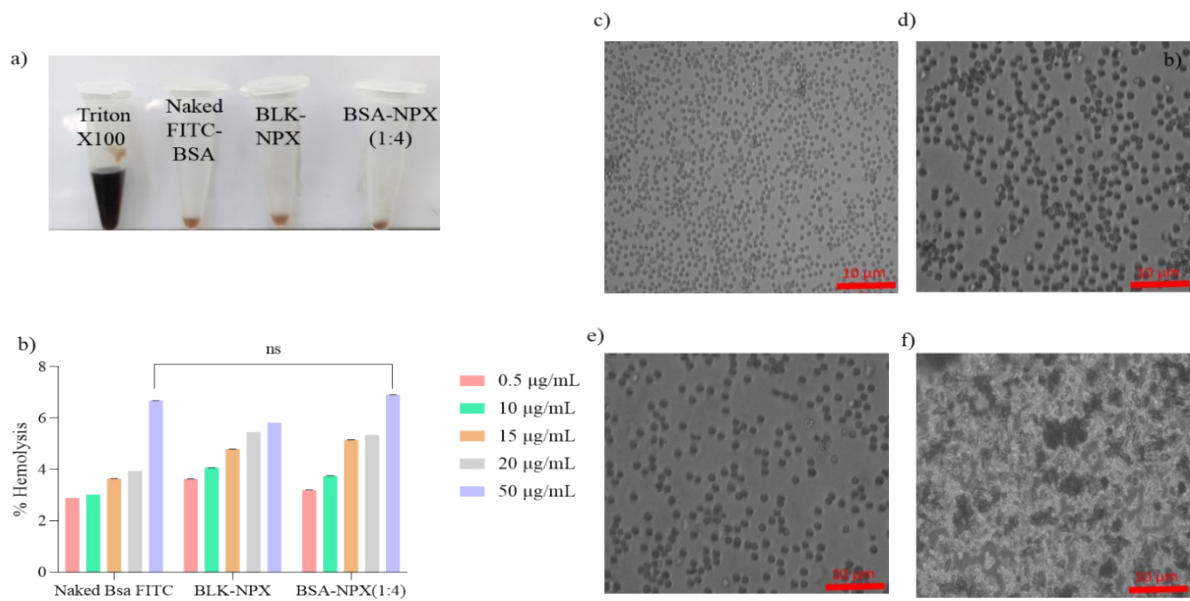

1

2 Figure S3. a) and b) Visual illustration and % hemolysis of the blood of Swiss albino mice  
 3 after incubation with NPX for 1 h, c)–f) Microscopic images of blood cells after treatment  
 4 with naked FITC-BSA, BLK-NPX, BSA-NPX (1:4), and Triton X100. Data are represented  
 5 as mean  $\pm$  SD (n = 3)
